# Supplementary material for: The hydration of glucose: the local configurations in sugar–water hydrogen bonds
Source: Royal Society of Chemistry journal article supplement (doi:10.1039/b708719e), 2007-11-19
Supplement: b708719e.pdf [file b708719e.pdf]

**Electronic Supplementary Information**  
for  
***The hydration of glucose: the local configurations in  
sugar–water hydrogen bonds***

Teppei Suzuki

*Advanced Research Institute for Science and Engineering, Waseda University, 3-4-1 Okubo,  
Shinjuku, Tokyo 169-8555, Japan.*

Table S1: computational details

Table S2: the conformational properties of the staggered hydroxymethyl groups in my *ab initio* molecular dynamics simulations

Fig. S1: three staggered hydroxymethyl rotational conformations

Fig. S2: the dipole moment of water molecules in the first hydration shell

## Supplementary Tables

**Table S1.** Computational details.

| Simulation          | Initial<br>conformation | Cut-off energy<br>(Ry) | Fictitious<br>mass (au) | Time step (fs) | Time length of<br>microcanonical<br>simulation (ps) |
|---------------------|-------------------------|------------------------|-------------------------|----------------|-----------------------------------------------------|
| The $\beta$ anomer  |                         |                        |                         |                |                                                     |
| <b>1</b>            | G <sup>+</sup>          | 70                     | 400                     | 0.0968         | 8.2                                                 |
| <b>2</b>            | G <sup>+</sup>          | 70                     | 400                     | 0.0968         | 6.0                                                 |
| <b>3</b>            | G <sup>+</sup>          | 70                     | 400                     | 0.0968         | 6.0                                                 |
| <b>4</b>            | G <sup>−</sup>          | 80                     | 340                     | 0.0822         | 10.0                                                |
| <b>5</b>            | G <sup>−</sup>          | 70                     | 400                     | 0.0968         | 6.0                                                 |
| <b>6</b>            | T                       | 70                     | 400                     | 0.0968         | 6.0                                                 |
| <b>7</b>            | T                       | 70                     | 400                     | 0.0968         | 6.0                                                 |
| The $\alpha$ anomer |                         |                        |                         |                |                                                     |
| <b>8</b>            | G <sup>+</sup>          | 70                     | 400                     | 0.0968         | 6.0                                                 |
| <b>9</b>            | G <sup>+</sup>          | 70                     | 400                     | 0.0968         | 6.0                                                 |
| <b>10</b>           | G <sup>−</sup>          | 70                     | 400                     | 0.0968         | 6.0                                                 |
| <b>11</b>           | G <sup>−</sup>          | 70                     | 400                     | 0.0968         | 6.0                                                 |
| <b>12</b>           | G <sup>−</sup>          | 80                     | 340                     | 0.0822         | 10.0                                                |
| <b>13</b>           | T                       | 70                     | 400                     | 0.0968         | 6.0                                                 |
| <b>14</b>           | T                       | 70                     | 400                     | 0.0968         | 6.0                                                 |

**Table S2.** The conformational properties of the staggered hydroxymethyl groups in my *ab initio* molecular dynamics simulations

|                     | O5–C5–C6–O6   |                   | C5–C6–O6–H6   |                                  |
|---------------------|---------------|-------------------|---------------|----------------------------------|
|                     | Average (deg) | Rotamer           | Average (deg) | Rotamer                          |
| The $\beta$ anomer  |               |                   |               |                                  |
| <b>1</b>            | —             | G <sup>+</sup> /T | —             | g <sup>+</sup> /t/g <sup>−</sup> |
| <b>2</b>            | 62.7          | G <sup>+</sup>    | 181.5         | t                                |
| <b>3</b>            | 75.0          | G <sup>+</sup>    | −59.2         | g <sup>−</sup>                   |
| <b>4</b>            | −68.4         | G <sup>−</sup>    | 66.8          | g <sup>+</sup>                   |
| <b>5</b>            | −59.7         | G <sup>−</sup>    | −132.6        | t                                |
| <b>6</b>            | 129.1         | T                 | 183.4         | t                                |
| <b>7</b>            | 152.5         | T                 | −81.7         | g <sup>−</sup>                   |
| The $\alpha$ anomer |               |                   |               |                                  |
| <b>8</b>            | 61.3          | G <sup>+</sup>    | −85.0         | g <sup>−</sup>                   |
| <b>9</b>            | 59.5          | G <sup>+</sup>    | −138.1        | t                                |
| <b>10</b>           | −58.9         | G <sup>−</sup>    | −85.9         | g <sup>−</sup>                   |
| <b>11</b>           | −66.4         | G <sup>−</sup>    | 70.7          | g <sup>+</sup>                   |
| <b>12</b>           | −60.8         | G <sup>−</sup>    | 75.9          | g <sup>+</sup>                   |
| <b>13</b>           | 166.0         | T                 | 137.8         | t                                |
| <b>14</b>           | —             | G <sup>+</sup> /T | —             | g <sup>−</sup> /t                |

I refer to the rotamers associated with the C5–C6–O6–H6 torsion angle as g<sup>+</sup> ( $\approx +60^\circ$ ), g<sup>−</sup> ( $\approx -60^\circ$ ), and t ( $\approx 180^\circ$ ). If there existed two or three distinct rotamers in a simulation, then the average value is not shown because it is almost meaningless; instead, the rotamers that actually appeared in that simulation are simply reported, being separated by the slash. The average value for the O5–C5–C6–O6 angle in **6** (129.1 deg) deviates significantly from its ideal value (180 deg), but the conformation is still viewed as the T rotamer; the deviation of this kind is discussed in my previous work [T. Suzuki, H. Kawashima and T. Sota, *J. Phys. Chem. B*, 2006, **110**, 2405].

## Supplementary Figures

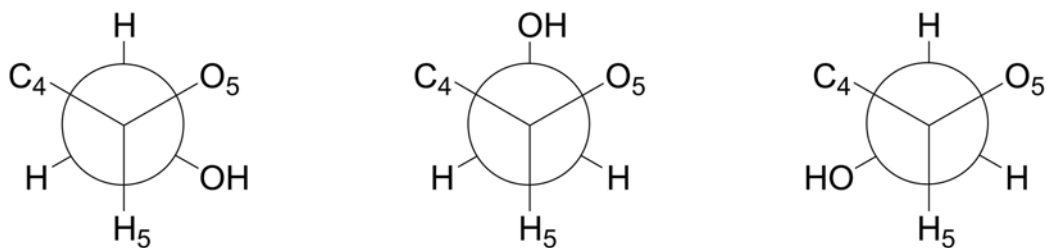

**Fig. S1.** The three staggered hydroxymethyl rotational conformations. From left to right:  $G^+$ ,  $G^-$ , and T. (These are also referred to as *gt*, *gg*, and *tg* in the literature.)

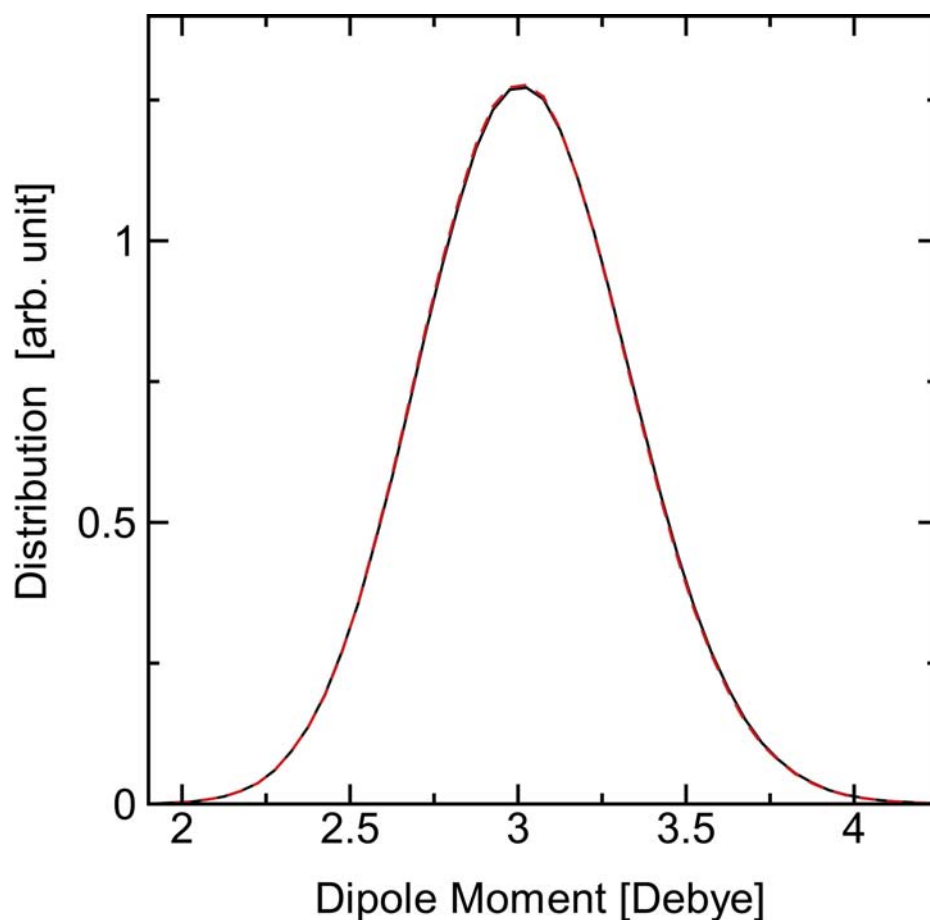

**Fig. S2.** The dipole moment of water molecules in the liquid: black solid line, the dipole moment of water molecules that formed H-bonds with water molecules (including water molecules forming H-bonds with first-hydration-shell water molecules); red dashed line, the dipole moment of water molecules that formed H-bonds neither with the glucose molecule nor with first-hydration-shell water molecules. The results show that the two distributions are almost identical. For this reason, it is relevant to regard those water molecules which form H-bonds only with water molecules as *bulk* water molecules for my main objective.
